# Supplementary material
Source: PubMed Central journal article supplement (PMC5665372)
Supplement: NIHMS889824-supplement-001763_-_Supplemental_Material.pdf [file NIHMS889824-supplement-001763_-_Supplemental_Material.pdf]

## SUPPLEMENTAL MATERIAL

### Contents:

|                                                                                                                                                                                                                                                                                                                                                                  |    |
|------------------------------------------------------------------------------------------------------------------------------------------------------------------------------------------------------------------------------------------------------------------------------------------------------------------------------------------------------------------|----|
| <b>Methods</b> .....                                                                                                                                                                                                                                                                                                                                             | 2  |
| <b>Cardiac magnetic resonance imaging acquisition protocol</b> .....                                                                                                                                                                                                                                                                                             | 2  |
| <b>Cardiac magnetic resonance imaging data analysis</b> .....                                                                                                                                                                                                                                                                                                    | 2  |
| <b>Library Preparation</b> .....                                                                                                                                                                                                                                                                                                                                 | 3  |
| <b>Capture Enrichment</b> .....                                                                                                                                                                                                                                                                                                                                  | 4  |
| <b>Sequencing</b> .....                                                                                                                                                                                                                                                                                                                                          | 5  |
| <b>Primary Data Analysis</b> .....                                                                                                                                                                                                                                                                                                                               | 5  |
| <b>Figures</b> .....                                                                                                                                                                                                                                                                                                                                             | 8  |
| Figure S1. Number of VOIs discovered per gene ( <b>Panel A</b> ). Number of VOIs discovered per gene normalized by transcript length ( <b>Panel B</b> ). .....                                                                                                                                                                                                   | 8  |
| Figure S2. Proportion of patients with at least one variant in the well characterized LVNC gene set <sup>7</sup> (LVNC), cardiomyopathy gene set (Cardio) or a loss of function mutation in the cardiomyopathy gene set (Cardio LoF) ( <b>Panel A</b> ). Proportion of subjects with 0, 1, 2 or 3+ variants in cardiomyopathy gene set ( <b>Panel B</b> ). ..... | 9  |
| Figure S3. CMR imaging of 12-year old patient with SYNE2 mutation successfully resuscitated after cardiac arrest. ....                                                                                                                                                                                                                                           | 10 |
| <b>Tables</b> .....                                                                                                                                                                                                                                                                                                                                              | 11 |
| Table S1. Well characterized LVNC gene list. <sup>7</sup> .....                                                                                                                                                                                                                                                                                                  | 11 |
| Table S2. Cardiomyopathy gene list. Genes commonly associated with cardiomyopathy and with available clinical tests.....                                                                                                                                                                                                                                         | 12 |
| Table S3. Discovered variants in cardiomyopathy genes (N=190). .....                                                                                                                                                                                                                                                                                             | 14 |
| Table S4. Presence of LVNC gene mutation according to Online Mendelian Inheritance in Man (OMIM) database.* .....                                                                                                                                                                                                                                                | 29 |
| Table S5. Sample and variant in long-QT syndrome genes with MAF in European populations.....                                                                                                                                                                                                                                                                     | 31 |
| Table S6. Truncating mutations in TTN, band-location and exon usage. ....                                                                                                                                                                                                                                                                                        | 33 |
| <b>References</b> .....                                                                                                                                                                                                                                                                                                                                          | 34 |

## **Methods**

### **Cardiac magnetic resonance imaging acquisition protocol**

All examinations were performed with an 8–element torso placed phased–array coil. Images were obtained during suspended respiration at end–expiration. Scout images were acquired initially to identify the cardiac location. Subsequently, balanced steady-state free precession cine images were acquired in three left ventricular long-axis views and a set of multiple contiguous short–axis slices from the atrioventricular ring to the apex (slice thickness 8 mm, intersection gap 2 mm). Typical parameters were echo time 1.6 ms, repetition time 3.6 ms, flip angle 55°, temporal resolution <50 ms, matrix size 224x224, field of view 300-450 mm, and receiver bandwidth 558 Hz/pixel. Delayed enhancement imaging was performed using a segmental inversion recovery sequence at least 10 minutes after intravenous injection of 0.2 mmol/kg gadobutrol (Gadovist, Bayer Schering Pharma, Berlin, Germany). Three standard long-axis and multiple contiguous short-axis views of the left ventricle (LV) were acquired (slice thickness 8 mm, intersection gap 2 mm). Inversion time was continuously adjusted to null normal myocardium. Typical parameters were echo time 3.2 ms, repetition time 6.8 ms, time of inversion 160-320 ms, flip angle 20°, matrix size 224x160, field of view 300-450 mm, and receiver bandwidth 140 Hz/pixel.

### **Cardiac magnetic resonance imaging data analysis**

Maximal ratio of non-compacted to compacted myocardium (NC/C) was measured in end-diastole in the LV long-axis views. The true LV apex (segment 17)<sup>1</sup> was excluded from this

calculation because of expected artificially high values.<sup>2</sup> Measurements of the thickness of the non-compacted myocardium were obtained from base to the peak of the most prominent trabeculae. If the LV cavity at the level of interest was entirely filled with trabeculae, the thickness of non-compacted myocardium was measured to the LV central axis. Meticulous care was taken to exclude the papillary muscles, their heads and the site of attachment of their bases to the trabeculae carneae in the measurements.<sup>3</sup> Measurements of the thickness of the compacted myocardium included fifty percent of the chemical shift artifact on the epicardial surface.<sup>4</sup>

LV volumes and ejection fraction were calculated. Papillary muscles and trabeculations were considered to be part of the LV cavity and included in calculations of LV volumes. LV volumes were indexed to the body surface area to account for the variations in body weight between subjects. Dilated cardiomyopathy phenotype was defined by the presence of LV dilatation (LVEDV>2SD from normal corrected by body surface area and gender) and systolic dysfunction (LVEF<45%) [PMID: 26792875].

### **Library Preparation**

Libraries were constructed into Illumina paired-end pre-capture libraries according to the manufacturer's protocol (*Illumina Multiplexing\_SamplePrep\_Guide\_1005361\_D*) with modifications as described in the BCM-HGSC protocol (<https://www.hgsc.bcm.edu/content/protocols-sequencing-library-construction>). Libraries were prepared using Beckman robotic workstations (Biomek FX and FXp models). Briefly, 0.5 ug of DNA was sheared into fragments of approximately 200-300 base pairs with the Covaris E210 system followed by end-repair (NEBNext End-Repair Module, Cat. No.

E6050L), A-tailing (NEBNext dA-Tailing Module, Cat. No. E6053L), and ligation of the Illumina multiplexing PE adaptors with barcode sequences using the ExpressLink T4 DNA Ligase (a custom product from Life Technologies). Pre-capture ligation-mediated PCR (LM-PCR) was performed for 6-8 cycles using the Library Amplification Readymix containing KAPA HiFi DNA Polymerase (Kapa Biosystems, Inc., Cat. No. KK2612). Universal primer IMUX-P1.0 and IMUX-P3.0 were used in the PCR amplification. Purification was performed with Agencourt AMPure XP beads after enzymatic reactions. Size distribution of the pre-capture LM-PCR product was determined using the LabChip GX electrophoresis system (PerkinElmer), and quantification was performed by gel analysis using AlphaView SA Version 3.4 software.

### **Capture Enrichment**

The pre-capture libraries were pooled together in equimolar amounts (6 samples/pool, totaling 1.5 ug/pool) and then hybridized in solution to the 42Mb HGSC VCRome 2.1 design<sup>5</sup> (NimbleGen, Cat. No. 06266380001) according to the manufacturer's protocol *NimbleGen SeqCap EZ Exome Library SR User's Guide* with minor revisions. Post-capture LM-PCR amplification was performed using the Library Amplification Readymix containing KAPA HiFi DNA Polymerase with 12 cycles of amplification. After the final AMPure XP bead purification, quantity and size of the capture library was analyzed using the LabChip GX electrophoresis system. The efficiency of the capture was evaluated by performing a qPCR-based quality check on the enrichment level of four standard NimbleGen control loci.

Successful enrichment of the capture libraries was estimated to range from a 6 to 9 of  $\Delta C_t$  value over the non-enriched samples.

## **Sequencing**

Library templates were prepared for sequencing using Illumina's cBot cluster generation system with TruSeq PE Cluster Generation Kits (Cat. No. PE-401-3001) according to the manufacturer's protocol. Briefly, these libraries were denatured with sodium hydroxide and diluted to 6-9 pM in hybridization buffer in order to achieve a load density of ~800K clusters/mm. Each library pool was loaded in a single lane of a HiSeq flow cell, and each lane was spiked with 2% phiX control library for run quality control. The sample libraries then underwent bridge amplification to form clonal clusters, followed by hybridization with the sequencing primer. Sequencing runs were performed in paired-end mode using the Illumina HiSeq 2000 platform. Using the TruSeq SBS Kits (Cat. No. FC-401-3001), sequencing-by-synthesis reactions were extended for 101 cycles from each end, with an additional 7 cycles for the index read. With sequencing yields averaging 7 Gb per sample, samples achieved an average of 93% of the targeted exome bases covered to a depth of 20X or greater.

## **Primary Data Analysis**

Initial sequence analysis was performed using the HGSC Mercury analysis pipeline<sup>6</sup> (<https://www.hgsc.bcm.edu/content/mercury>). In summary, the .bcl files produced on-instrument were first transferred into the HGSC analysis infrastructure by the HiSeq Real-time Analysis module. Mercury then ran the vendor's primary analysis software (CASAVA)

to de-multiplex pooled samples and generate sequence reads and base-call confidence values (qualities), followed by the mapping of reads to the GRCh37 Human reference genome (<http://www.ncbi.nlm.nih.gov/projects/genome/assembly/grc/human/>) using the Burrows-Wheeler aligner, <http://bio-bwa.sourceforge.net/>. The resulting BAM (binary alignment/map) file underwent quality recalibration using GATK (<http://www.broadinstitute.org/gatk/>), and where necessary the merging of separate sequence-event BAMs into a single sample-level BAM. BAM sorting, duplicate read marking, and realignment to improve in/del discovery all occur at this step.

Variants are subsequently annotated with the Cassandra suite which evaluates the variant effect on RefSeq and USCS gene models using AnnoVar. MAFs are reported from multiple sources including 1000 genomes, ExAc and EVS. Variant deleteriousness is predicted from ~10 models from dbNSFP. Gene function, association to disease and associated phenotypes are collected from OMIM, SwissProt, and Entrez. Additionally, variants were filtered if they had a minor allele frequency >0.5% (averaged from Thousand Genomes, ExAc and ESP), >1% if they had been previously associated with disease (HGMD) or >2% if the variant was homozygous or there was a second variant in the gene. Variants were filtered if they were marked as benign or likely benign in ClinVar from multiple (“mult”) institutions. Variants were prioritized if they occurred in a known LVNC gene, known cardiomyopathy gene (non-LVNC), or a muscular dystrophy gene (Table S1 and Table S2). Alleles were considered interesting based upon zygosity, minor allele frequency, association to disease and predicted deleteriousness (polyphen HVAR). An exception to this approach was made for *TTN*, in

which only truncating mutations (nonsense, splicing, and frameshift) were considered interesting.

### **Variant enrichment analyses**

Variant of interest (VOIs) enrichment analysis was conducted using an in-house developed script. Variants were considered interesting if they met the following criteria: minor allele frequency (MAF) < 0.2%, variant present in at least 25% of all reads covering variant position, nonsynonymous variants must be considered deleterious by Polyphen2 HVAR, and variant is present in a known LVNC or cardiomyopathy gene (Table S1 and Table S2). To evaluate the significance of this result we obtained a cohort of 425 phenotypically unselected (“normal”), Americans of European descent, controls which had been sequenced, and data processed in an identical manner to our LVNC cohort.

## Figures

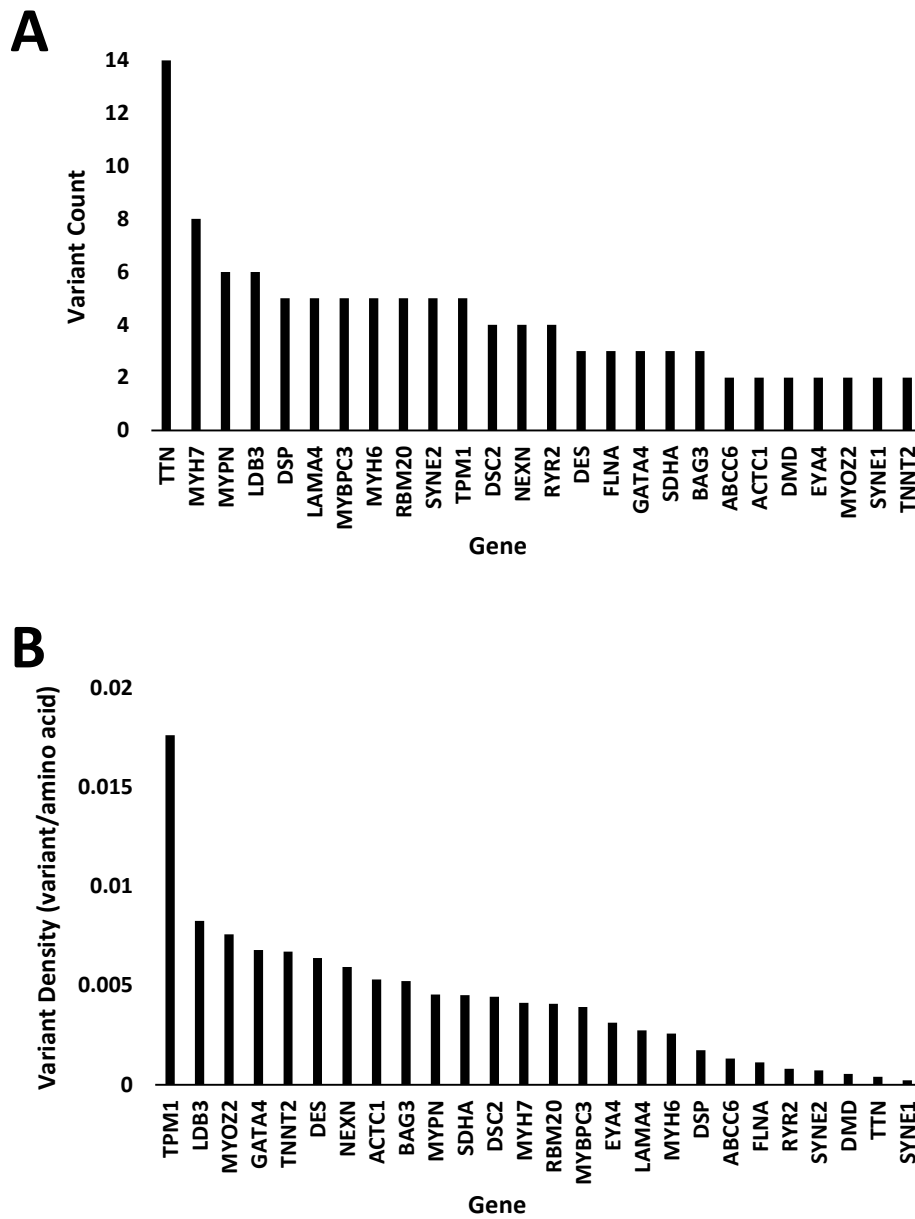

Figure S1. Number of VOIs discovered per gene (**Panel A**). Number of VOIs discovered per gene normalized by transcript length (**Panel B**).



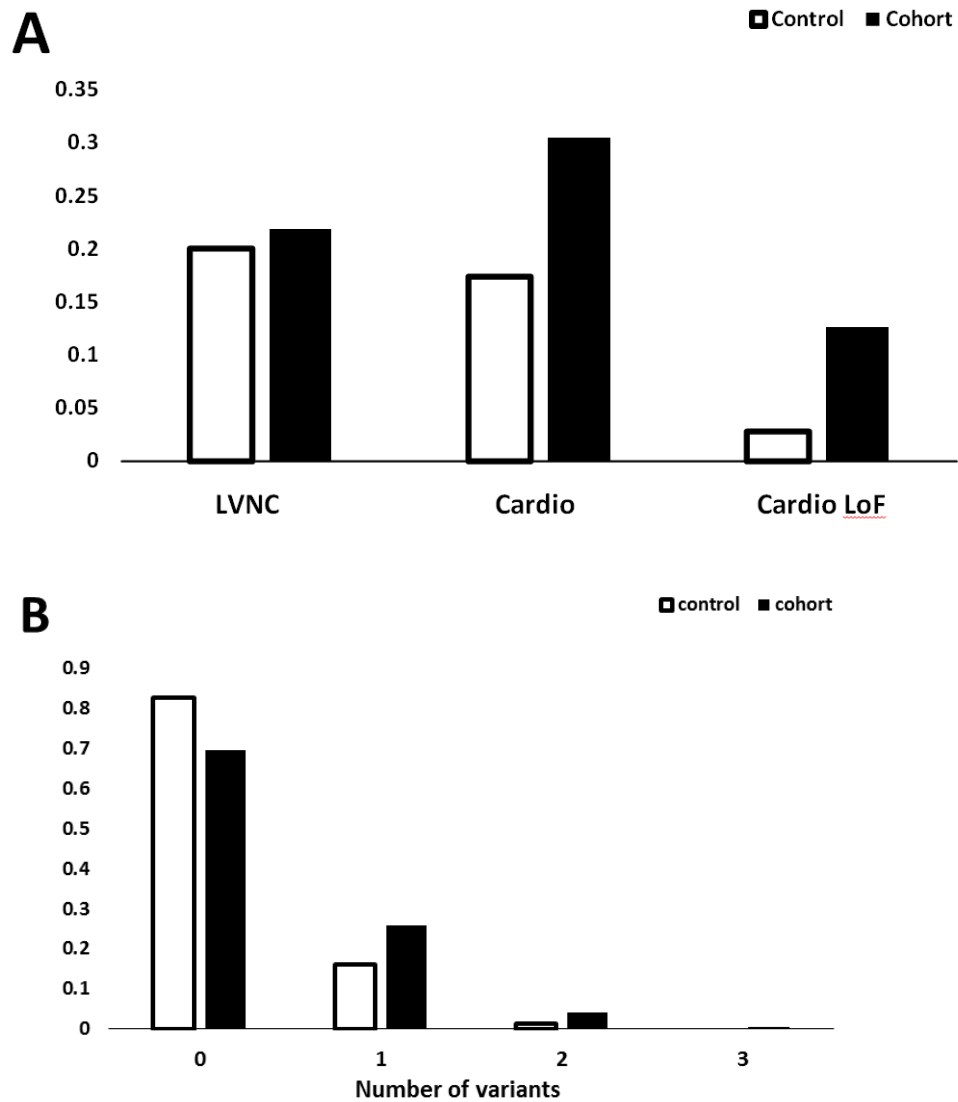

Figure S2. Proportion of patients with at least one variant in the well characterized LVNC gene set<sup>7</sup> (LVNC), cardiomyopathy gene set (Cardio) or a loss of function mutation in the cardiomyopathy gene set (Cardio LoF) (**Panel A**). Proportion of subjects with 0, 1, 2 or 3+ variants in cardiomyopathy gene set (**Panel B**).

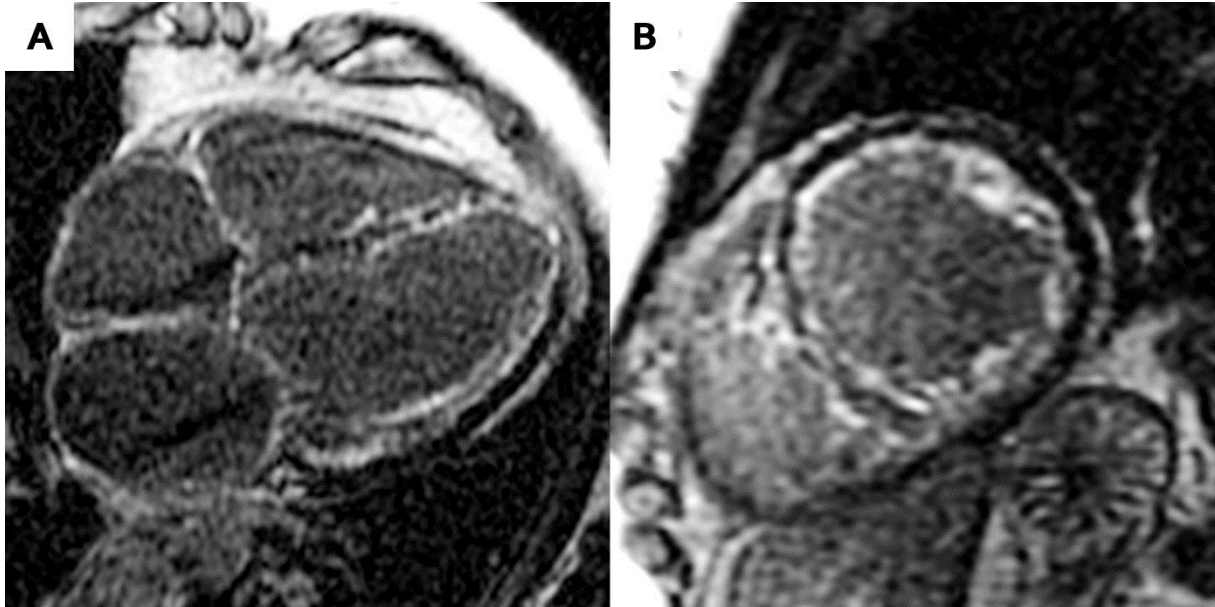

Figure S3. CMR imaging of 12-year old patient with SYNE2 mutation successfully resuscitated after cardiac arrest.

Four-chamber view (**Panel A**) and short axis view (**Panel B**) demonstrating extensive late gadolinium enhancement in subendocardial and non-compacted myocardial layer of left ventricle. Presence of late gadolinium enhancement was not confined only to non-compacted segments indicating LVNC is a diffuse pathology. Five months later patient underwent orthotopic heart transplantation due to end-stage heart failure.

## Tables

Table S1. Well characterized LVNC gene list.<sup>7</sup>

|         |
|---------|
| ABCCP   |
| ACTC1   |
| ACTN2   |
| CASQ2   |
| DMPK    |
| DSP     |
| DTNA    |
| HCN4    |
| LDB3    |
| LMNA    |
| MIB1    |
| MYBPC3  |
| MYH7    |
| NNT     |
| PKP2    |
| PLEKHM2 |
| PRDM16  |
| RYR2    |
| SCN5A   |
| TAZ     |
| TNNT2   |
| TPM1    |

Table S2. Cardiomyopathy gene list. Genes commonly associated with cardiomyopathy and with available clinical tests.

|               |               |               |                |               |
|---------------|---------------|---------------|----------------|---------------|
| <i>ABCC6</i>  | <i>FKTN</i>   | <i>MTMR14</i> | <i>MYLK2</i>   | <i>SOS1</i>   |
| <i>ABCC9</i>  | <i>FLNA</i>   | <i>MTND1</i>  | <i>MYOZ2</i>   | <i>SYNE1</i>  |
| <i>ACTC1</i>  | <i>FLNC</i>   | <i>MTND5</i>  | <i>MYPN</i>    | <i>SYNE2</i>  |
| <i>ACTN2</i>  | <i>FLT1</i>   | <i>MTND6</i>  | <i>NEBL</i>    | <i>TAZ</i>    |
| <i>ANG</i>    | <i>GATA4</i>  | <i>MTTD</i>   | <i>NEXN</i>    | <i>TBX1</i>   |
| <i>ANKRD1</i> | <i>GATAD1</i> | <i>MTTG</i>   | <i>NRAS</i>    | <i>TBX20</i>  |
| <i>BAG3</i>   | <i>GLA</i>    | <i>MTHH</i>   | <i>PDLIM3</i>  | <i>TCAP</i>   |
| <i>BRAF</i>   | <i>HRAS</i>   | <i>MTTI</i>   | <i>PLEC</i>    | <i>TGFB3</i>  |
| <i>CAV3</i>   | <i>ILK</i>    | <i>MTTK</i>   | <i>PLN</i>     | <i>TMEM43</i> |
| <i>CITED2</i> | <i>JPH2</i>   | <i>MTTL1</i>  | <i>PRDM16</i>  | <i>TMPO</i>   |
| <i>CRELD1</i> | <i>JUP</i>    | <i>MTTL2</i>  | <i>PRKAG2</i>  | <i>TNNC1</i>  |
| <i>CRYAB</i>  | <i>KCNE1</i>  | <i>MTTM</i>   | <i>PRKARIA</i> | <i>TNNI3</i>  |
| <i>CSRP3</i>  | <i>KRAS</i>   | <i>MTTQ</i>   | <i>PSEN1</i>   | <i>TNNT2</i>  |
| <i>DES</i>    | <i>LAMA4</i>  | <i>MTTS1</i>  | <i>PTPN11</i>  | <i>TPM1</i>   |
| <i>DMD</i>    | <i>LAMP2</i>  | <i>MTTS2</i>  | <i>RAF1</i>    | <i>TTN</i>    |
| <i>DSC2</i>   | <i>LDB3</i>   | <i>MYBPC3</i> | <i>RBM20</i>   | <i>TTR</i>    |
| <i>DSP</i>    | <i>LMNA</i>   | <i>MYH6</i>   | <i>RYR2</i>    | <i>VCL</i>    |
| <i>DTNA</i>   | <i>MAP2K1</i> | <i>MYH7</i>   | <i>SCN5A</i>   |               |
| <i>EMD</i>    | <i>MAP2K2</i> | <i>MYL2</i>   | <i>SDHA</i>    |               |
| <i>EYA4</i>   | <i>MEF2A</i>  | <i>MYL3</i>   | <i>SGCD</i>    |               |



Table S3. Discovered variants in cardiomyopathy genes (N=190).

| ID*         | Family | Pheno | Solved case | Number of VOIs | Gene symbol   | VOI | CHR | POS       | REF   | VAR | MAF      | Protein effect   | Deleteriousness prediction | Disease causing in HGMD | ClinVar  | ClinVar source            |
|-------------|--------|-------|-------------|----------------|---------------|-----|-----|-----------|-------|-----|----------|------------------|----------------------------|-------------------------|----------|---------------------------|
| <b>93</b>   | H      | LVNC  | Yes         | 4              | <i>ACTC1</i>  | Yes | 15  | 35085571  | G     | A   | 0        | p.A110V          | D                          | No                      |          |                           |
|             |        |       |             |                | <i>BAG3</i>   | Yes | 10  | 121432151 | G     | A   | 0.001034 | p.V298M          | B                          | No                      | US       | Single                    |
|             |        |       |             |                | <i>TGFB3</i>  | Yes | 14  | 76446886  | G     | A   | 0.000116 | p.H117H          | n/a                        | No                      |          |                           |
|             |        |       |             |                | <i>TTN</i>    | Yes | 2   | 179397443 | TCTCA | T   | 0        | p.32991_32992del | n/a                        | Prox, DCM               |          |                           |
| <b>176*</b> | H      | LVNC  | Yes         | 4              | <i>ACTC1</i>  | Yes | 15  | 35085571  | G     | A   | 0        | p.A110V          | D                          | No                      |          |                           |
|             |        |       |             |                | <i>BAG3</i>   | Yes | 10  | 121432151 | G     | A   | 0.001034 | p.V298M          | B                          | No                      | US       | Single                    |
|             |        |       |             |                | <i>TGFB3</i>  | Yes | 14  | 76446886  | G     | A   | 0.000116 | p.H117H          | n/a                        | No                      |          |                           |
|             |        |       |             |                | <i>TTN</i>    | Yes | 2   | 179397443 | TCTCA | T   | 0        | p.32991_32992del | n/a                        | Prox, DCM               |          |                           |
| <b>4</b>    |        | LVNC  | Yes         | 3              | <i>CRYAB</i>  | Yes | 11  | 111782333 | G     | A   | 0.001244 | p.P39L           | D                          | No                      | US       | Single                    |
|             |        |       |             |                | <i>LMNA</i>   | Yes | 1   | 156105901 | C     | T   | 0        | p.G382G          | n/a                        | Yes, MDLG               | LPIP     | Single Single             |
|             |        |       |             |                | <i>MYLK2</i>  | Yes | 20  | 30419883  | C     | T   | 0        | p.R552X          | n/a                        | No                      |          |                           |
| <b>90</b>   |        | LVNC  | Yes         | 3              | <i>MYH7</i>   | Yes | 14  | 23900678  | G     | A   | 0.001022 | p.R249X          | n/a                        | Prox                    |          |                           |
|             |        |       |             |                | <i>TPM1</i>   | Yes | 15  | 63363291  | A     | G   | 0.000883 | p.K259E          | B                          | No                      | LB US US | Single No_criteria Single |
|             |        |       |             |                | <i>PRKAG2</i> | Yes | 7   | 151257534 | T     | A   | 0        | p.K133I          | D                          | No                      |          |                           |
| <b>94</b>   |        | LVNC  | Yes         | 3              | <i>ACTC1</i>  | Yes | 15  | 35084476  | C     | T   | 0.000233 | p.R208H          | B                          | No                      |          |                           |
|             |        |       |             |                | <i>DSC2</i>   | Yes | 18  | 28648964  | G     | T   | 0        | p.H802N          | P                          | No                      |          |                           |
|             |        |       |             |                | <i>TPM1</i>   | Yes | 15  | 63340850  | G     | C   | 0        | p.E26Q           | D                          | No                      |          |                           |
|             |        |       |             |                | <i>TGFB3</i>  | No  | 14  | 76446944  | G     | A   | 0.001558 | p.S98L           | B                          | No                      | LB       | Single                    |

|     |      |     |   |        |     |    |           |                                   |   |          |                  |     |               |                   |                                          |
|-----|------|-----|---|--------|-----|----|-----------|-----------------------------------|---|----------|------------------|-----|---------------|-------------------|------------------------------------------|
| 105 | LVNC | Yes | 3 | MYBPC3 | Yes | 11 | 47372841  | CT                                | C | 0        | p.A80fs          | n/a | Prox, DCM     |                   |                                          |
|     |      |     |   | MYH6   | Yes | 14 | 23868200  | T                                 | C | 0.000918 | p.K543R          | P   | No            |                   |                                          |
|     |      |     |   | MYH6   | Yes | 14 | 23862647  | C                                 | G | 0        | p.E1003D         | P   | Prox, HCM     |                   |                                          |
| 124 | LVHT | Yes | 3 | DMD    | Yes | X  | 32305736  | G                                 | A | 0        | p.T2063M         | P   | Prox, DMD     |                   |                                          |
|     |      |     |   | MYPN   | Yes | 10 | 69955255  | C                                 | T | 0.000686 | p.R1042C         | D   | No            | US                | No_criteria                              |
|     |      |     |   | VCL    | Yes | 10 | 75871701  | T                                 | G | 0        | p.V927G          | B   | No            |                   |                                          |
| 140 | LVNC | Yes | 3 | MYH7   | Yes | 14 | 23890217  | C                                 | A | 0.001069 | p.D1096Y         | D   | No            | US US             | Single Single                            |
|     |      |     |   | SDHA   | Yes | 5  | 231050    | C                                 | T | 0.000836 | p.T277M          | P   | No            |                   |                                          |
|     |      |     |   | TTN    | Yes | 2  | 179499117 | TCTTCT<br>TGCCCT<br>CCACC<br>TCAG | T | 0        | p.32991_32992del | n/a | No            |                   |                                          |
| 187 | LVNC | Yes | 2 | SCN5A  | Yes | 3  | 38592390  | G                                 | A | 0        | p.L1807F         | D   | Prox,<br>LQTS |                   |                                          |
|     |      |     |   | SCN5A  | No  | 3  | 38591847  | G                                 | C | 0.002172 | p.P1988A         | B   | Yes, LQTS     | UNK US <br>US     | Conf Single No_criteria                  |
|     |      |     |   | TPM1   | Yes | 15 | 63363291  | A                                 | G | 0.000883 | p.K259E          | B   | No            | LB US U<br>S      | Single No_criteria Single                |
| 5   | LVNC | Yes | 2 | MYBPC3 | Yes | 11 | 47354175  | C                                 | T | 0        | p.R1190H         | D   | Prox, HCM     |                   |                                          |
|     |      |     |   | MYBPC3 | No  | 11 | 47367871  | C                                 | T | 0.004326 | p.R326Q          | B   | Yes, HCM      | UNK B L<br>B LB B | Conf Single No_criteria No_criteria Mult |
|     |      |     |   | TMPO   | Yes | 12 | 98931409  | T                                 | G | 0        | p.I241S          | P   | No            |                   |                                          |
| 7   | LVNC | Yes | 2 | MYH7   | Yes | 14 | 23893148  | C                                 | G | 0.001326 | p.V964L          | D   | Yes, DCM      | US LP L<br>P US   | Single Single Single                     |
|     |      |     |   | TTN    | Yes | 2  | 179449558 | G                                 | A | 0        | p.R12731X        | n/a | No            |                   |                                          |

|            |   |      |     |   |              |     |    |           |   |   |          |                |     |           |                 |                                                   |
|------------|---|------|-----|---|--------------|-----|----|-----------|---|---|----------|----------------|-----|-----------|-----------------|---------------------------------------------------|
| <b>31</b>  |   | LVNC | Yes | 2 | <i>DSC2</i>  | Yes | 18 | 28672114  | C | T | 0.001294 | p.E102K        | B   | No        | US LB U<br>S LP | Single N<br>o_criteria<br> No_crite<br>ria Single |
|            |   |      |     |   | <i>LDB3</i>  | Yes | 10 | 88452322  | G | A | 0.001813 | p.R365K        | B   | No        |                 |                                                   |
| <b>40</b>  |   | LVNC | Yes | 2 | <i>TPM1</i>  | Yes | 15 | 63354797  | C | T | 0        | p.A242V        | D   | Prox, DCM | US              | Single                                            |
|            |   |      |     |   | <i>TTN</i>   | Yes | 2  | 179588756 | C | T | 0        | p.W5833X       | n/a | No        |                 |                                                   |
| <b>41</b>  |   | LVNC | Yes | 2 | <i>RBM20</i> | Yes | 10 | 112572068 | C | T | 0        | p.P638L        | D   | Yes, DCM  | P,P P           | Single Si<br>ngle Sing<br>le                      |
|            |   |      |     |   | <i>TTR</i>   | Yes | 18 | 29178580  | C | T | 0        | p.A129V        | B   | Yes, EH   | UNK             | No_criter<br>ia                                   |
| <b>43</b>  |   | LVNC | Yes | 2 | <i>LAMA4</i> | Yes | 6  | 112441643 | G | A | 0        | p.S1503F       | D   | No        |                 |                                                   |
|            |   |      |     |   | <i>TBX1</i>  | Yes | 22 | 19750765  | C | T | 0        | p.R138W        | D   | No        |                 |                                                   |
| <b>45</b>  |   | LVNC | Yes | 2 | <i>ABCC6</i> | Yes | 16 | 16248830  | C | T | 0.001168 | p.R1314Q       | D   | Yes, PEAD |                 |                                                   |
|            |   |      |     |   | <i>RBM20</i> | Yes | 10 | 112595636 | C | A | 0.002091 | p.S1195Y       | D   | No        | US              | Single                                            |
| <b>48</b>  |   | LVNC | Yes | 2 | <i>DES</i>   | Yes | 2  | 220286116 | G | T | 0        | p.A360S        | D   | Yes, DRM  |                 |                                                   |
|            |   |      |     |   | <i>LDB3</i>  | Yes | 10 | 88492723  | T | A | 0        | p.I615N        | D   | No        |                 |                                                   |
| <b>65*</b> | F | LVHT | Yes | 2 | <i>FLNC</i>  | Yes | 7  | 128484198 | C | T | 0        | p.Q1024X       | n/a | No        |                 |                                                   |
|            |   |      |     |   | <i>RYR2</i>  | Yes | 1  | 237955507 | G | C | 0        | p.A4556P       | P   | Yes, VT   |                 |                                                   |
| <b>67</b>  |   | LVNC | Yes | 2 | <i>RBM20</i> | Yes | 10 | 112572217 | C | T | 0        | p.R688X        | n/a | No        | US              | Single                                            |
|            |   |      |     |   | <i>TTN</i>   | Yes | 2  | 179537132 | A | G | 0        | g.179537132A>G | n/a | No        |                 |                                                   |
| <b>69</b>  |   | LVNC | Yes | 2 | <i>LAMA4</i> | Yes | 6  | 112443287 | C | T | 0.000882 | p.A1462T       | D   | No        | US              | Mult                                              |
|            |   |      |     |   | <i>MYPN</i>  | Yes | 10 | 69970208  | T | C | 0        | p.L1320P       | D   | No        |                 |                                                   |
|            |   |      |     |   | <i>NEXN</i>  | No  | 1  | 78395131  | A | C | 0.002386 | p.E332A        | B   | No        | LB US           | Single Si<br>ngle                                 |
| <b>70</b>  |   | LVHT | Yes | 2 | <i>DSP</i>   | Yes | 6  | 7585825   | C | A | 0.000233 | p.P2777H       | D   | No        | US              | Single                                            |
|            |   |      |     |   | <i>GATA4</i> | Yes | 8  | 11615875  | C | G | 0        | p.P407R        | D   | Yes, CHD  |                 |                                                   |



|      |   |      |     |   |        |     |    |           |     |   |          |                 |     |                    |             |                           |
|------|---|------|-----|---|--------|-----|----|-----------|-----|---|----------|-----------------|-----|--------------------|-------------|---------------------------|
| 77   |   | LVNC | Yes | 2 | LDB3   | Yes | 10 | 88441535  | G   | A | 0.001325 | p.A222T         | D   | No                 | US US       | Single Si                 |
|      |   |      |     |   | TTN    | Yes | 2  | 179454576 | G   | A | 0.000604 | p.R11753X       | n/a | No                 | L P         | ngle Single               |
| 85   |   | LVHT | Yes | 2 | MEF2A  | Yes | 15 | 100173373 | C   | T | 0        | p.R17X          | n/a | No                 |             |                           |
|      |   |      |     |   | RYR2   | Yes | 1  | 237886543 | T   | C | 0        | p.V3557A        | B   | No                 |             |                           |
| 86   |   | LVNC | Yes | 2 | FKTN   | Yes | 9  | 108363422 | A   | G | 0.000815 | g.108363422A>G  | n/a | No                 | US US       | Single Si                 |
|      |   |      |     |   | MYH6   | Yes | 14 | 23855633  | T   | G | 0.000116 | p.K1617T        | D   | No                 |             | ngle                      |
| 87   |   | LVNC | Yes | 2 | DMD    | Yes | X  | 31893318  | G   | T | 0.000539 | p.P1021Q        | P   | Prox, DMD          |             |                           |
|      |   |      |     |   | MYH7   | Yes | 14 | 23902306  | G   | A | 0        | p.S111F         | P   | Prox, HCM          |             |                           |
| 136* | L | LVHT | Yes | 2 | ABCC9  | Yes | 12 | 21971098  | G   | C | 0        | p.L1253V        | B   | No                 |             |                           |
|      |   |      |     |   | SYNE2  | Yes | 14 | 64542818  | G   | C | 0        | p.K3674N        | D   | No                 |             |                           |
| 137  |   | LVHT | Yes | 2 | DSP    | Yes | 6  | 7585486   | C   | A | 0        | p.T2664N        | P   | Prox, ARVD         |             |                           |
|      |   |      |     |   | EYA4   | Yes | 6  | 133789765 | C   | T | 0.001059 | p.T266M         | D   | Prox, hearing loss | US US       | Single Si                 |
| 139  |   | LVHT | Yes | 2 | SDHA   | Yes | 5  | 251554    | C   | T | 0.00144  | p.R589W         | D   | Yes, paraganglioma | P           | No_criteria               |
|      |   |      |     |   | TTN    | Yes | 2  | 179616770 | GAA | G | 0        | g.179616771delA | n/a | No                 | LB          | Single                    |
| 145  | F | LVNC | Yes | 2 | FLNC   | Yes | 7  | 128484198 | C   | T | 0        | p.Q1024X        | n/a | No                 |             |                           |
|      |   |      |     |   | RYR2   | Yes | 1  | 237955507 | G   | C | 0        | p.A4556P        | P   | Yes, VT            |             |                           |
| 146  |   | LVNC | Yes | 2 | DSC2   | Yes | 18 | 28672114  | C   | T | 0.001294 | p.E102K         | B   | No                 | US LB US LP | Single No_criteria Single |
|      |   |      |     |   | DSC2   | Yes | 18 | 28669437  | G   | A | 0.000929 | p.R199C         | P   | Prox, ARVD         |             |                           |
| 150  |   | LVHT | Yes | 2 | PLEC   | Yes | 8  | 144998035 | G   | A | 0.000127 | p.A2025V        | D   | No                 |             |                           |
|      |   |      |     |   | PRDM16 | Yes | 1  | 3329327   | G   | A | 0.000125 | p.A856T         | D   | No                 |             |                           |

|            |   |      |     |             |                    |     |           |           |   |    |          |           |     |                           |                   |                                          |
|------------|---|------|-----|-------------|--------------------|-----|-----------|-----------|---|----|----------|-----------|-----|---------------------------|-------------------|------------------------------------------|
|            |   |      |     | <i>PLEC</i> | No                 | 8   | 145016631 | C         | T | 0  | p.R18Q   | B         | No  |                           |                   |                                          |
| <b>1</b>   |   | LVNC | Yes | 1           | <i>MYH7</i>        | Yes | 14        | 23890217  | C | A  | 0.001069 | p.D1096Y  | D   | No                        | US US             | Single Single                            |
|            |   |      |     |             | <i>ACTN2</i>       | No  | 1         | 236902618 | G | A  | 0.001186 | p.R298H   | P   | No                        | US US             | Single Single                            |
| <b>134</b> |   | LVHT | Yes | 1           | <i>MYBPC3</i>      | Yes | 11        | 47356691  | G | A  | 0.001815 | p.T936M   | D   | No                        |                   |                                          |
|            |   |      |     |             | <i>MYBPC3</i>      | No  | 11        | 47357479  | C | T  | 0.00547  | p.V896M   | B   | No                        | UNK UNK           | Conf Conf                                |
| <b>6</b>   |   | LVNC | Yes | 1           | <i>TNNC1</i>       | Yes | 3         | 52486140  | C | T  | 0        | p.D62N    | D   | Prox, DCM                 |                   |                                          |
| <b>8*</b>  | A | LVHT | Yes | 1           | <i>RYR2</i>        | Yes | 1         | 237801771 | A | G  | 0        | p.R2303G  | D   | Yes, VT                   |                   |                                          |
| <b>9</b>   |   | LVNC | Yes | 1           | <i>PRKARI</i><br>A | Yes | 17        | 66525105  | A | AG | 0        | p.P288fs  | n/a | Yes,<br>Carney<br>complex |                   |                                          |
| <b>10</b>  |   | LVHT | Yes | 1           | <i>GATA4</i>       | Yes | 8         | 11612602  | A | T  | 0        | p.K319N   | B   | Prox, ASD                 |                   |                                          |
| <b>12</b>  |   | LVNC | Yes | 1           | <i>MYH7</i>        | Yes | 14        | 23882972  | G | A  | 0        | p.T1929M  | B   | Yes, HCM                  | US                | No_criteria                              |
| <b>13</b>  |   | LVHT | Yes | 1           | <i>MYPN</i>        | Yes | 10        | 69926074  | G | A  | 0        | p.G542R   | P   | No                        |                   |                                          |
| <b>15</b>  |   | LVNC | Yes | 1           | <i>MYPN</i>        | Yes | 10        | 69925569  | G | A  | 0        | p.V532M   | D   | Yes, RCM                  | US                | Single                                   |
| <b>17</b>  |   | LVHT | Yes | 1           | <i>FLNA</i>        | Yes | X         | 153588864 | A | C  | 0        | p.L1100R  | D   | No                        |                   |                                          |
| <b>20*</b> | B | LVHT | Yes | 1           | <i>TTN</i>         | Yes | 2         | 179439257 | G | A  | 0        | p.R14995X | n/a | No                        | P P               | Single Single                            |
| <b>25</b>  |   | LVNC | Yes | 1           | <i>SYNE1</i>       | Yes | 6         | 152456241 | T | C  | 0        | p.M8596V  | B   | No                        | US                | Single                                   |
| <b>27</b>  |   | LVNC | Yes | 1           | <i>MYH7</i>        | Yes | 14        | 23896502  | T | A  | 0        | p.K635X   | n/a | No                        |                   |                                          |
| <b>30</b>  |   | LVNC | Yes | 1           | <i>LAMA4</i>       | Yes | 6         | 112512888 | C | T  | 0.00085  | p.R223H   | B   | No                        | LB                | Single                                   |
|            |   |      |     |             | <i>MYBPC3</i>      | No  | 11        | 47367871  | C | T  | 0.004326 | p.R326Q   | B   | Yes, HCM                  | UNK B L<br>B LB B | Conf Single No_criteria No_criteria Mult |
| <b>33</b>  |   | LVNC | Yes | 1           | <i>NEXN</i>        | Yes | 1         | 78401671  | C | G  | 0        | p.A472G   | D   | No                        |                   |                                          |
| <b>34</b>  |   | LVNC | Yes | 1           | <i>LAMA4</i>       | Yes | 6         | 112508755 | G | C  | 0.001266 | p.A281G   | P   | No                        | US                | Single                                   |

|     |   |      |     |   |               |     |    |           |    |    |          |                 |     |          |           |                                 |
|-----|---|------|-----|---|---------------|-----|----|-----------|----|----|----------|-----------------|-----|----------|-----------|---------------------------------|
| 35  |   | LVNC | Yes | 1 | <i>MYH7</i>   | Yes | 14 | 23902827  | C  | T  | 0.000942 | p.V39M          | D   | No       | US US     | Single No_criteria              |
| 36  |   | LVNC | Yes | 1 | <i>LAMA4</i>  | Yes | 6  | 112435335 | G  | A  | 0        | p.P1750L        | D   | No       | US        | Single                          |
| 42  |   | LVNC | Yes | 1 | <i>TTN</i>    | Yes | 2  | 179416513 | G  | A  | 0        | p.Q21499X       | n/a | No       |           |                                 |
| 44  | A | LVNC | Yes | 1 | <i>RYR2</i>   | Yes | 1  | 237801771 | A  | G  | 0        | p.R2303G        | D   | Prox, VT |           |                                 |
| 46  |   | LVNC | Yes | 1 | <i>ABCC6</i>  | Yes | 16 | 16244435  | C  | T  | 0.000977 | p.R1468Q        | D   | No       |           |                                 |
|     |   |      |     |   | <i>PRKAG2</i> | No  | 7  | 151478279 | G  | A  | 0.002132 | p.T142I         | D   | No       | US US     | Single Single                   |
| 49  |   | LVNC | Yes | 1 | <i>TNNT2</i>  | Yes | 1  | 201333484 | C  | G  | 0        | p.R104P         | P   | Yes, RCM |           |                                 |
| 50  |   | LVNC | Yes | 1 | <i>LDB3</i>   | Yes | 10 | 88441401  | C  | T  | 0        | p.A177V         | B   | No       |           |                                 |
|     |   |      |     |   | <i>PSENI</i>  | No  | 14 | 73673178  | A  | G  | 0.017511 | p.E318G         | B   | No       | NP B      | No_assertion Single             |
| 53  |   | LVHT | Yes | 1 | <i>DSP</i>    | Yes | 6  | 7584061   | G  | A  | 0.001119 | p.R2189Q        | B   | No       |           |                                 |
| 54  |   | LVHT | Yes | 1 | <i>MYL2</i>   | Yes | 12 | 111352043 | G  | A  | 0        | p.P74L          | D   | No       |           |                                 |
| 59  |   | LVHT | Yes | 1 | <i>NEXN</i>   | Yes | 1  | 78408504  | G  | A  | 0        | p.S673N         | P   | No       |           |                                 |
| 62  |   | LVNC | Yes | 1 | <i>LDB3</i>   | Yes | 10 | 88452322  | G  | A  | 0.001813 | p.R365K         | B   | No       |           |                                 |
| 63  |   | LVHT | Yes | 1 | <i>TTN</i>    | Yes | 2  | 179547454 | G  | A  | 0        | p.R9778X        | n/a | No       |           |                                 |
|     |   |      |     |   | <i>MYH7</i>   | No  | 14 | 23889445  | T  | TG | 0        | g.23889445insG  | n/a | No       | B LB B LB | Multi No_criteria Single Single |
| 64  |   | LVNC | Yes | 1 | <i>TTN</i>    | Yes | 2  | 179407387 | AC | A  | 0        | g.179407388delC | n/a | No       |           | Multi No_criteria Single Single |
|     |   |      |     |   | <i>MYH7</i>   | No  | 14 | 23889445  | T  | TG | 0        | g.23889445insG  | n/a | No       | B LB B LB | Multi No_criteria Single Single |
| 66* | G | LVHT | Yes | 1 | <i>TTN</i>    | Yes | 2  | 179460312 | G  | A  | 0        | p.R10384X       | n/a | No       | P         | Single                          |

|            |   |      |     |   |               |     |    |           |   |   |          |                |     |                                          |              |                                              |
|------------|---|------|-----|---|---------------|-----|----|-----------|---|---|----------|----------------|-----|------------------------------------------|--------------|----------------------------------------------|
|            |   |      |     |   | <i>GPD1L</i>  | No  | 3  | 32200588  | C | T | 0.000898 | p.A280V        | B   | No                                       | P P          | No_criter<br>ia Single                       |
| <b>71*</b> | A | LVHT | Yes | 1 | <i>RYR2</i>   | Yes | 1  | 237801771 | A | G | 0        | p.R2303G       | D   | Yes, VT                                  |              |                                              |
| <b>75</b>  |   | LVNC | Yes | 1 | <i>TNNI3</i>  | Yes | 19 | 55666174  | G | A | 0        | p.R103C        | D   | No                                       | LP,US        | Single,Si<br>ngle                            |
| <b>76</b>  |   | LVHT | Yes | 1 | <i>DSP</i>    | Yes | 6  | 7583551   | C | T | 0        | p.A2019V       | D   | No                                       |              |                                              |
| <b>78</b>  |   | LVHT | Yes | 1 | <i>FLNA</i>   | Yes | X  | 153594950 | C | T | 0.000153 | p.E349K        | B   | Prox,<br>Melnick-<br>Needles<br>syndrome | LP           | Single                                       |
|            |   |      |     |   | <i>DMD</i>    | No  | X  | 32509625  | A | C | 0.010678 | p.N797K        | P   | Yes, DMD                                 | B            | Mult                                         |
| <b>79</b>  |   | LVNC | Yes | 1 | <i>SYNE2</i>  | Yes | 14 | 64604613  | G | A | 0        | p.A4919T       | B   | No                                       |              |                                              |
|            |   |      |     |   | <i>RBM20</i>  | No  | 10 | 112544125 | C | T | 0.009005 | p.S455L        | B   | No                                       | LB US L<br>B | Single N<br>o_criteria<br> Single            |
| <b>82</b>  |   | LVNC | Yes | 1 | <i>ANG</i>    | Yes | 14 | 21162102  | G | A | 0        | p.V127I        | B   | Yes, ALS                                 |              |                                              |
| <b>83</b>  |   | LVHT | Yes | 1 | <i>SYNE2</i>  | Yes | 14 | 64599128  | G | A | 0.000116 | p.C4829Y       | B   | No                                       |              |                                              |
| <b>88</b>  |   | LVHT | Yes | 1 | <i>GATA4</i>  | Yes | 8  | 11614524  | G | C | 0.001104 | p.E360Q        | D   | Prox, CHD                                |              |                                              |
|            |   |      |     |   | <i>RBM20</i>  | No  | 10 | 112540556 | C | T | 0        | g.112540556C>T | n/a | No                                       |              |                                              |
| <b>91</b>  |   | LVNC | Yes | 1 | <i>MYBPC3</i> | Yes | 11 | 47364162  | C | G | 0        | p.G531R        | D   | No                                       |              |                                              |
| <b>98</b>  |   | LVNC | Yes | 1 | <i>FLT1</i>   | Yes | 13 | 29041266  | C | G | 0.001156 | p.R54S         | P   | No                                       |              |                                              |
|            |   |      |     |   | <i>HADHA</i>  | No  | 2  | 26418053  | C | G | 0.001185 | p.E510Q        | D   | Yes, MTPD                                | P P P P      | Single N<br>o_criteria<br> Single Si<br>ngle |
| <b>99</b>  | I | LVNC | Yes | 1 | <i>MYPN</i>   | Yes | 10 | 69948821  | C | T | 0.001046 | p.R955W        | D   | Yes, DCM                                 |              |                                              |
| <b>100</b> |   | LVNC | Yes | 1 | <i>SYNE1</i>  | Yes | 6  | 152697692 | G | C | 0.003431 | p.L3057V       | D   | No                                       | US           | Single                                       |
| <b>102</b> |   | LVNC | Yes | 1 | <i>FLNA</i>   | Yes | X  | 153594950 | C | T | 0.000153 | p.E349K        | B   | Prox,<br>Melnick-<br>Needles<br>syndrome | LP           | Single                                       |

|            |   |      |     |   |               |     |    |           |     |     |          |              |     |           |                   |                                                          |
|------------|---|------|-----|---|---------------|-----|----|-----------|-----|-----|----------|--------------|-----|-----------|-------------------|----------------------------------------------------------|
| <b>104</b> |   | LVNC | Yes | 1 | <i>LDB3</i>   | Yes | 10 | 88485922  | C   | CCA | 0        | p.C559fs     | n/a | No        | UNK B L<br>B LB B | Conf Sin<br>gle No_cr<br>iteria No<br>_criteria <br>Mult |
|            |   |      |     |   | <i>MYBPC3</i> | No  | 11 | 47367871  | C   | T   | 0.004326 | p.R326Q      | B   | Yes, HCM  |                   |                                                          |
| <b>106</b> |   | LVNC | Yes | 1 | <i>DSP</i>    | Yes | 6  | 7580597   | C   | T   | 0        | p.R1392W     | D   | No        |                   |                                                          |
| <b>107</b> |   | LVHT | Yes | 1 | <i>TTN</i>    | Yes | 2  | 179424674 | TG  | T   | 0        | p.V19855fs   | n/a | No        |                   |                                                          |
| <b>109</b> |   | LVNC | Yes | 1 | <i>RBM20</i>  | Yes | 10 | 112572217 | C   | T   | 0        | p.R688X      | n/a | No        | US                | Single                                                   |
| <b>111</b> |   | LVHT | Yes | 1 | <i>MYH6</i>   | Yes | 14 | 23855633  | T   | G   | 0.000116 | p.K1617T     | P   | No        |                   |                                                          |
| <b>113</b> |   | LVHT | Yes | 1 | <i>NEXN</i>   | Yes | 1  | 78392569  | C   | T   | 0.000317 | p.R286W      | P   | No        | US                | Single                                                   |
| <b>114</b> | L | LVHT | Yes | 1 | <i>SYNE2</i>  | Yes | 14 | 64542818  | G   | C   | 0        | p.K3674N     | D   | No        |                   |                                                          |
| <b>115</b> |   | LVHT | Yes | 1 | <i>RAF1</i>   | Yes | 3  | 12626121  | TAG | T   | 0        | p.398_398del | n/a | No        |                   |                                                          |
| <b>116</b> |   | LVHT | Yes | 1 | <i>RYR2</i>   | Yes | 1  | 237863581 | C   | G   | 0        | p.L3061V     | P   | No        |                   |                                                          |
| <b>122</b> |   | LVHT | Yes | 1 | <i>PSEN1</i>  | Yes | 14 | 73637754  | C   | T   | 0        | p.L109L      | n/a | No        |                   |                                                          |
| <b>128</b> |   | LVHT | Yes | 1 | <i>CRELD1</i> | Yes | 3  | 9985136   | C   | T   | 0.001837 | p.R329C      | D   | Yes, CASD | UNK               | No_criter<br>ia<br>Single N<br>o_criteria<br> Single     |
|            |   |      |     |   | <i>RBM20</i>  | No  | 10 | 112544125 | C   | T   | 0.009005 | p.S455L      | B   | No        | LB US L<br>B      |                                                          |
| <b>130</b> |   | LVHT | Yes | 1 | <i>BAG3</i>   | Yes | 10 | 121436505 | GGA | G   | 0        | p.480_481del | n/a | Yes, DCM  |                   |                                                          |
| <b>131</b> |   | LVHT | Yes | 1 | <i>MYBPC3</i> | Yes | 11 | 47362719  | A   | C   | 0        | p.C623G      | B   | Prox, DCM |                   |                                                          |
| <b>142</b> |   | LVNC | Yes | 1 | <i>MYPN</i>   | Yes | 10 | 69933879  | T   | G   | 0        | p.L677W      | D   | No        |                   |                                                          |
| <b>148</b> |   | LVNC | Yes | 1 | <i>TNNT2</i>  | Yes | 1  | 201333459 | A   | C   | 0        | p.N112K      | B   | Prox, DCM |                   |                                                          |
| <b>153</b> |   | LVHT | Yes | 1 | <i>MYOZ2</i>  | Yes | 4  | 120107309 | C   | T   | 0        | p.T250I      | B   | Prox, HCM |                   |                                                          |
| <b>155</b> |   | LVHT | Yes | 1 | <i>MYH6</i>   | Yes | 14 | 23871705  | C   | A   | 0        | p.R370L      | B   | No        |                   |                                                          |
| <b>156</b> |   | LVNC | Yes | 1 | <i>TPM1</i>   | Yes | 15 | 63340632  | G   | T   | 0        | p.C132X      | n/a | No        |                   |                                                          |
| <b>157</b> | G | LVNC | Yes | 1 | <i>TTN</i>    | Yes | 2  | 179460312 | G   | A   | 0        | p.R10384X    | n/a | No        | P                 | Single                                                   |

|      |   |      |     |   |        |     |    |           |     |   |          |              |     |                            |                         |                                                               |
|------|---|------|-----|---|--------|-----|----|-----------|-----|---|----------|--------------|-----|----------------------------|-------------------------|---------------------------------------------------------------|
| 158  | K | LVNC | Yes | 1 | BAG3   | Yes | 10 | 121411324 | C   | T | 0        | p.T46I       | P   | No                         |                         |                                                               |
| 159* | I | LVHT | Yes | 1 | MYPN   | Yes | 10 | 69948821  | C   | T | 0.001046 | p.R955W      | D   | Yes, DCM                   |                         |                                                               |
| 162  |   | LVNC | Yes | 1 | RBM20  | Yes | 10 | 112583337 | C   | T | 0        | p.P1139L     | B   | No                         |                         |                                                               |
| 163  |   | LVHT | Yes | 1 | CITED2 | Yes | 6  | 139694540 | C   | G | 0        | p.S181T      | B   | Prox, CHD                  |                         |                                                               |
| 166  |   | LVNC | Yes | 1 | NEXN   | Yes | 1  | 78383380  | G   | A | 0.000302 | p.E53K       | D   | No                         |                         |                                                               |
| 167  |   | LVNC | Yes | 1 | DES    | Yes | 2  | 220283390 | T   | C | 0        | p.L69P       | B   | No                         |                         |                                                               |
| 170  |   | LVNC | Yes | 1 | KCNE1  | Yes | 21 | 35821680  | C   | T | 0.012454 | p.D85N       | P   | Yes, LQTS                  | UNK PU<br>NK US U<br>NK | No_criter<br>ia No_cri<br>teria Con<br>f No_crit<br>eria Conf |
| 171  |   | LVNC | Yes | 1 | TBX20  | Yes | 7  | 35244184  | CCA | C | 0        | p.300_300del | n/a | No                         |                         |                                                               |
| 172  |   | LVNC | Yes | 1 | DES    | Yes | 2  | 220284873 | G   | A | 0.00086  | p.R212Q      | D   | No                         | US US U<br>S            | Single N<br>o_criteria<br> Single                             |
| 173  |   | LVNC | Yes | 1 | MTMR14 | Yes | 3  | 9711175   | C   | T | 0        | p.R185X      | n/a | No                         |                         |                                                               |
| 175  |   | LVHT | Yes | 1 | SDHA   | Yes | 5  | 236628    | C   | T | 0.001812 | p.A449V      | D   | Prox,<br>Paraganglio<br>ma |                         |                                                               |
| 181  |   | LVNC | Yes | 1 | SYNE2  | Yes | 14 | 64586160  | A   | C | 0.000929 | p.I4286L     | P   | No                         |                         |                                                               |
| 182  |   | LVHT | Yes | 1 | SYNE2  | Yes | 14 | 64655398  | T   | C | 0        | p.I5948T     | D   | No                         |                         |                                                               |
| 183  |   | LVNC | Yes | 1 | EYA4   | Yes | 6  | 133827275 | G   | A | 0        | p.R408H      | B   | No                         |                         |                                                               |
| 184  |   | LVNC | Yes | 1 | TTN    | Yes | 2  | 179474705 | CA  | C | 0        | p.P8275fs    | n/a | No                         |                         |                                                               |
| 188  |   | LVHT | Yes | 1 | TTN    | Yes | 2  | 179417257 | C   | A | 0        | p.E21251X    | n/a | No                         |                         |                                                               |
| 190  |   | LVNC | Yes | 1 | MYOZ2  | Yes | 4  | 120107234 | C   | T | 0.000139 | p.P225L      | B   | No                         | US                      | Single                                                        |
| 19   |   | LVHT | No  | 0 | ABCC9  | No  | 12 | 21971087  | A   | G | 0.003481 | p.L1256L     | n/a | No                         | B B                     | No_criter<br>ia Mult                                          |
| 21   |   | LVHT | No  | 0 | TNNC1  | No  | 3  | 52485426  | G   | T | 0.00158  | p.D145E      | D   | No                         |                         |                                                               |
| 23   |   | LVNC | No  | 0 | TGFB3  | No  | 14 | 76446944  | G   | A | 0.001558 | p.S98L       | B   | No                         | LB                      | Single                                                        |

|            |   |      |    |   |               |    |    |           |   |    |          |          |     |                       |              |                                                   |
|------------|---|------|----|---|---------------|----|----|-----------|---|----|----------|----------|-----|-----------------------|--------------|---------------------------------------------------|
| <b>37*</b> | D | LVNC | No | 0 | <i>MYBPC3</i> | No | 11 | 47357479  | C | T  | 0.00547  | p.V896M  | B   | No                    | UNK UNK      | Conf Conf                                         |
| <b>38</b>  |   | LVNC | No | 0 | <i>PRDM16</i> | No | 1  | 3328948   | C | G  | 0.001186 | p.F729L  | B   | No                    |              |                                                   |
| <b>39</b>  |   | LVNC | No | 0 | <i>KCNQ1</i>  | No | 11 | 2869088   | G | GC | 0        | p.G629fs | n/a | Yes, LQTS             |              |                                                   |
| <b>51</b>  |   | LVHT | No | 0 | <i>RBM20</i>  | No | 10 | 112581039 | G | A  | 0.003724 | p.D888N  | P   | No                    | US LB LB US  | Single No_criteria No_criteria No_criteria Single |
| <b>52</b>  |   | LVHT | No | 0 | <i>RYR2</i>   | No | 1  | 237617756 | G | C  | 0.000792 | p.S453T  | P   | No                    |              |                                                   |
| <b>55*</b> | E | LVHT | No | 0 | <i>LAMA4</i>  | No | 6  | 112476110 | C | A  | 0.000883 | p.D660Y  | D   | No                    | US US        | Multi No_criteria                                 |
| <b>56</b>  |   | LVNC | No | 0 | <i>MYH7</i>   | No | 14 | 23885449  | C | T  | 0.001766 | p.E1573K | P   | No                    |              |                                                   |
|            |   |      |    |   | <i>TMPO</i>   | No | 12 | 98926856  | G | A  | 0.003902 | p.R274K  | B   | No                    | LB LB        | Single Single                                     |
| <b>57</b>  |   | LVHT | No | 0 | <i>RBM20</i>  | No | 10 | 112544125 | C | T  | 0.009005 | p.S455L  | B   | No                    | LB US LB     | Single No_criteria Single                         |
| <b>58</b>  |   | LVHT | No | 0 | <i>SCO2</i>   | No | 22 | 50962423  | C | T  | 0.001105 | p.E140K  | D   | No                    | P P P        | No_criteria No_criteria Single                    |
| <b>60</b>  |   | LVHT | No | 0 | <i>ACTN2</i>  | No | 1  | 236902618 | G | A  | 0.001186 | p.R298H  | P   | No                    | US US        | Single Single                                     |
| <b>72</b>  |   | LVHT | No | 0 | <i>DSP</i>    | No | 6  | 7542236   | G | A  | 0.002856 | p.V30M   | B   | No                    | P UNK UNK US | No_criteria Conf Conf                             |
| <b>80</b>  |   | LVHT | No | 0 | <i>SCN5A</i>  | No | 3  | 38645516  | C | T  | 0.000803 | p.R526H  | B   | Yes, Brugada syndrome | P            | No_criteria                                       |
| <b>84</b>  | D | LVNC | No | 0 | <i>MYBPC3</i> | No | 11 | 47357479  | C | T  | 0.00547  | p.V896M  | B   | No                    | UNK UNK      | Conf Conf                                         |
| <b>89</b>  |   | LVHT | No | 0 | <i>MAP2K2</i> | No | 19 | 4101253   | C | T  | 0        | p.R185Q  | B   | No                    |              |                                                   |
| <b>96</b>  |   | LVHT | No | 0 | <i>SCO2</i>   | No | 22 | 50962330  | G | A  | 0        | p.R171W  | D   | No                    | P            | No_criteria                                       |

|             |   |      |    |   |               |    |    |           |    |   |          |                |     |                               |                    |                                          |
|-------------|---|------|----|---|---------------|----|----|-----------|----|---|----------|----------------|-----|-------------------------------|--------------------|------------------------------------------|
| <b>101</b>  | J | LVNC | No | 0 | <i>DSP</i>    | No | 6  | 7556022   | G  | A | 0.001191 | p.C81Y         | D   | No                            | US US              | Single Single                            |
| <b>110</b>  |   | LVNC | No | 0 | <i>TGFB3</i>  | No | 14 | 76446944  | G  | A | 0.001558 | p.S98L         | B   | No                            | LB                 | Single                                   |
| <b>120</b>  |   | LVHT | No | 0 | <i>ACTN2</i>  | No | 1  | 236902618 | G  | A | 0.001186 | p.R298H        | P   | No                            | US US              | Single Single                            |
| <b>121</b>  |   | LVHT | No | 0 | <i>NEB</i>    | No | 2  | 152579918 | T  | C | 0        | p.Q232R        | P   | No                            |                    |                                          |
| <b>123</b>  |   | LVHT | No | 0 | <i>RYR2</i>   | No | 1  | 237778082 | G  | A | 0.022963 | p.G1885E       | B   | No                            |                    |                                          |
| <b>126</b>  |   | LVHT | No | 0 | <i>NKX2-5</i> | No | 5  | 172660192 | C  | A | 0.016123 | p.A119S        | B   | Yes,<br>Thyroid<br>dysgenesis | P LB               | No_criteria Single                       |
| <b>127</b>  |   | LVHT | No | 0 | <i>JPH2</i>   | No | 20 | 42788571  | T  | C | 0.004088 | p.T286A        | P   | No                            | US                 | Single                                   |
| <b>132*</b> | J | LVHT | No | 0 | <i>DSP</i>    | No | 6  | 7556022   | G  | A | 0.001191 | p.C81Y         | D   | No                            | US US              | Single Single                            |
|             |   |      |    |   | <i>TNNT2</i>  | No | 1  | 201330402 | C  | T | 0        | g.201330402C>T | n/a | Prox, DCM                     |                    |                                          |
| <b>133</b>  |   | LVHT | No | 0 | <i>FLNA</i>   | No | X  | 153594535 | G  | A | 0.016874 | p.T429M        | D   | No                            | B                  | Mult                                     |
| <b>135</b>  |   | LVHT | No | 0 | <i>MYH7</i>   | No | 14 | 23887578  | C  | T | 0.00122  | p.R1337Q       | B   | Prox, HCM                     | US                 | Single                                   |
| <b>141</b>  |   | LVNC | No | 0 | <i>MYBPC3</i> | No | 11 | 47367871  | C  | T | 0.004326 | p.R326Q        | B   | Yes, HCM                      | UNK B L<br>B LB B  | Conf Single No_criteria No_criteria Mult |
| <b>143</b>  | M | LVNC | No | 0 | <i>ACADVL</i> | No | 17 | 7128342   | C  | T | 0.001093 | p.R632C        | D   | No                            |                    |                                          |
|             |   |      |    |   | <i>DSC2</i>   | No | 18 | 28671068  | C  | T | 0.000883 | p.A133T        | B   | Yes,<br>ARVD                  |                    |                                          |
| <b>144</b>  |   | LVNC | No | 0 | <i>SCN5A</i>  | No | 3  | 38645249  | C  | T | 0.001181 | p.G615E        | D   | Yes, LQTS                     | P UNK U<br>S US LP | No_criteria Conf Single Single Single    |
|             |   |      |    |   | <i>JUP</i>    | No | 17 | 39925231  | G  | A | 0.002117 | p.R233C        | D   | No                            |                    |                                          |
| <b>151</b>  |   | LVHT | No | 0 | <i>MYBPC3</i> | No | 11 | 47357479  | C  | T | 0.00547  | p.V896M        | B   | No                            | UNK UN<br>K        | Conf Conf                                |
| <b>152</b>  |   | LVHT | No | 0 | <i>ITGA7</i>  | No | 12 | 56091332  | TG | T | 0.004381 | g.56091333delG | n/a | No                            | B                  | Single                                   |



|             |   |      |    |   |               |    |    |           |   |     |          |          |     |                         |           |                           |
|-------------|---|------|----|---|---------------|----|----|-----------|---|-----|----------|----------|-----|-------------------------|-----------|---------------------------|
| <b>154</b>  |   | LVHT | No | 0 | <i>LMNA</i>   | No | 1  | 156100408 | C | T   | 0.003796 | p.C7C    | n/a | Yes, EDMD               | B US LB   | Single Single No_criteria |
|             |   |      |    |   | <i>SCN5A</i>  | No | 3  | 38591847  | G | C   | 0.002172 | p.P1988A | B   | Yes, LQTS               | UNK US US | Conf Single No_criteria   |
| <b>160*</b> | M | LVHT | No | 0 | <i>ACADVL</i> | No | 17 | 7128342   | C | T   | 0.001093 | p.R632C  | D   | No                      |           |                           |
| <b>165*</b> | E | LVHT | No | 0 | <i>LAMA4</i>  | No | 6  | 112476110 | C | A   | 0.000883 | p.D660Y  | D   | No                      | US US     | Multi No_criteria         |
| <b>169</b>  |   | LVHT | No | 0 | <i>PKP2</i>   | No | 12 | 33021917  | C | G   | 0.001256 | p.A372P  | P   | No                      |           |                           |
| <b>177</b>  |   | LVNC | No | 0 | <i>FKTN</i>   | No | 9  | 108397472 | G | GCT | 0        | p.R438fs | n/a | No                      |           |                           |
| <b>180</b>  |   | LVHT | No | 0 | <i>BAG3</i>   | No | 10 | 121429462 | A | T   | 0.001732 | p.I94F   | D   | Yes, DCM                | UNK UNK   | Conf Conf                 |
| <b>185</b>  |   | LVHT | No | 0 | <i>TBX5</i>   | No | 12 | 114793602 | G | A   | 0        | p.T381I  | D   | Yes, Holt-Oram syndrome |           |                           |
| <b>186</b>  |   | LVHT | No | 0 | <i>FLNA</i>   | No | X  | 153594535 | G | A   | 0.016874 | p.T429M  | D   | No                      | B         | Multi                     |
| <b>2</b>    |   | LVNC | No | 0 | -             |    |    |           |   |     |          |          |     |                         |           |                           |
| <b>3</b>    |   | LVNC | No | 0 | -             |    |    |           |   |     |          |          |     |                         |           |                           |
| <b>11</b>   |   | LVHT | No | 0 | -             |    |    |           |   |     |          |          |     |                         |           |                           |
| <b>14</b>   |   | LVHT | No | 0 | -             |    |    |           |   |     |          |          |     |                         |           |                           |
| <b>16</b>   |   | LVHT | No | 0 | -             |    |    |           |   |     |          |          |     |                         |           |                           |
| <b>18</b>   |   | LVHT | No | 0 | -             |    |    |           |   |     |          |          |     |                         |           |                           |
| <b>22</b>   | B | LVHT | No | 0 | -             |    |    |           |   |     |          |          |     |                         |           |                           |
| <b>24</b>   |   | LVNC | No | 0 | -             |    |    |           |   |     |          |          |     |                         |           |                           |
| <b>26</b>   |   | LVNC | No | 0 | -             |    |    |           |   |     |          |          |     |                         |           |                           |
| <b>28</b>   | C | LVNC | No | 0 | -             |    |    |           |   |     |          |          |     |                         |           |                           |
| <b>29</b>   |   | LVHT | No | 0 | -             |    |    |           |   |     |          |          |     |                         |           |                           |
| <b>32</b>   |   | LVNC | No | 0 | -             |    |    |           |   |     |          |          |     |                         |           |                           |

|             |   |      |    |   |   |
|-------------|---|------|----|---|---|
| <b>47</b>   | E | LVNC | No | 0 | - |
| <b>61</b>   |   | LVNC | No | 0 | - |
| <b>68*</b>  | E | LVHT | No | 0 | - |
| <b>73*</b>  | C | LVHT | No | 0 | - |
| <b>74</b>   |   | LVHT | No | 0 | - |
| <b>81</b>   |   | LVHT | No | 0 | - |
| <b>92</b>   |   | LVHT | No | 0 | - |
| <b>95</b>   |   | LVHT | No | 0 | - |
| <b>97</b>   |   | LVNC | No | 0 | - |
| <b>103</b>  |   | LVHT | No | 0 | - |
| <b>108</b>  |   | LVHT | No | 0 | - |
| <b>112*</b> | K | LVHT | No | 0 | - |
| <b>117</b>  |   | LVHT | No | 0 | - |
| <b>118</b>  |   | LVHT | No | 0 | - |
| <b>119</b>  |   | LVHT | No | 0 | - |
| <b>125</b>  |   | LVHT | No | 0 | - |
| <b>129</b>  |   | LVHT | No | 0 | - |
| <b>138</b>  |   | LVHT | No | 0 | - |
| <b>147</b>  |   | LVNC | No | 0 | - |
| <b>149</b>  |   | LVHT | No | 0 | - |
| <b>161</b>  |   | LVHT | No | 0 | - |
| <b>164</b>  |   | LVNC | No | 0 | - |
| <b>168</b>  |   | LVHT | No | 0 | - |

|     |      |    |   |   |
|-----|------|----|---|---|
| 174 | LVHT | No | 0 | - |
| 178 | LVHT | No | 0 | - |
| 179 | LVHT | No | 0 | - |
| 189 | LVHT | No | 0 | - |

\* Multiple family members excluded from statistical analysis.

VOI variant of interest, CHR chromosome, LVHT left ventricular hypertrabeculation, LVNC left ventricular non-compaction, MAF minor allele frequency, PHENO phenotype on CMR, POS genomic position, REF reference allele at chromosome and position, VAR variant allele at position. B benign, D deleterious, P probably deleterious.

HGMD: no 'DM' or 'DM?' in HGMD, Prox within 3 amino acids of a disease causing allele in HGMD, LGMD limb girdle muscular dystrophy, EH euthyroid hyperthyroxinaemia, PEAD pseudoxanthoma elasticum, autosomal dominant, DRM mopathy, desmin related, VT ventricular tachycardia, ARVD arrhythmogenic right ventricular dysplasia/cardiomyopathy, MTPD mitochondrial trifunctional protein deficiency, CASD cardiac atrioventricular septal defect, EDMD muscular dystrophy, Emery-Dreifuss, CHD congenital heart disease, DCM dilated cardiomyopathy, HCM hypertrophic cardiomyopathy, DMD Duchenne muscular dystrophy, LQTS long QT syndrome, ASD atrial septal defect, ALS amyotrophic lateral sclerosis, and RCM restrictive cardiomyopathy.

CLINVAR: P pathogenic, LP likely pathogenic, LB likely benign, B benign, UNK unknown, US unspecified, No\_assertion no assertion provided, No\_criteria no assertion criteria provided, Single criteria provided single submitter, Mult criteria provided multiple submitters, Conf criteria provided conflicting interpretations.

Table S4. Presence of LVNC gene mutation according to Online Mendelian Inheritance in Man (OMIM) database.\*

| <b>Characteristic</b>                     | <b>Previously reported in LVNC (N=27)</b> | <b>Not previously reported in LVNC (N=75)</b> | <b>P Value</b> |
|-------------------------------------------|-------------------------------------------|-----------------------------------------------|----------------|
| Age – yr                                  | 32±17                                     | 25±16                                         | 0.08           |
| Male sex — no. (%)                        | 22 (81)                                   | 51 (68)                                       | 0.22           |
| <b>LV volume parameters</b>               |                                           |                                               |                |
| LVEF <50% – no. (%)                       | 12 (44)                                   | 23 (31)                                       | 0.20           |
| LVEF – %                                  | 43±20                                     | 50±14                                         | 0.10           |
| LVEDVI – ml/m <sup>2</sup>                | 128±58                                    | 111±45                                        | 0.12           |
| LVESVI – ml/m <sup>2</sup>                | 82±62                                     | 60±45                                         | 0.11           |
| <b>Distribution of non-compaction</b>     |                                           |                                               |                |
| Number of affected segments               | 8.9±3.1                                   | 8.1±2.9                                       | 0.24           |
| Inter-ventricular septum affected – no.   | 9 (33)                                    | 16 (21)                                       | 0.21           |
| Basal segments affected – no. (%)         | 11 (41)                                   | 20 (27)                                       | 0.17           |
| NC/C ratio                                | 2.9±1.0                                   | 2.5±0.7                                       | 0.01           |
| Fulfilled CMR criteria for LVNC – no. (%) | 24 (89)                                   | 44 (59)                                       | 0.004          |
| Presence of LGE – no. (%)                 | 10 (37)                                   | 7 (9)                                         | 0.001          |

\* LVNC genes/locus according to OMIM database: ACTC1, DTNA, LDB3, MIB1, MYBPC3, MYH7, PRDM16, TAZ, TNNT2, TPM1, and one locus on chromosome 11p15.

Multiple family members removed.

CMR denotes cardiac magnetic resonance, LGE late gadolinium enhancement, LVEDVI left ventricular end-diastolic volume index, LVEF left ventricular ejection fraction, LVESVI left ventricular end-systolic volume index, LVNC left ventricular non-compaction, and NC/C ratio of non-compacted to compacted myocardium.

Table S5. Sample and variant in long-QT syndrome genes with MAF in European populations.

| <b>ID</b> | <b>Gene</b>  | <b>Variant</b> | <b>Previously identified in HGMD</b> | <b>MAF</b> |
|-----------|--------------|----------------|--------------------------------------|------------|
| 65        | <i>FLNC</i>  | p.Q1024X       | No                                   | 0.000      |
| 145       | <i>FLNC</i>  | p.Q1024X       | No                                   | 0.000      |
| 20        | <i>KCNE1</i> | p.D85N         | Yes                                  | 0.011      |
| 27        | <i>KCNE1</i> | p.D85N         | Yes                                  | 0.011      |
| 61        | <i>KCNE1</i> | p.D85N         | Yes                                  | 0.011      |
| 85        | <i>KCNE1</i> | p.D85N         | Yes                                  | 0.011      |
| 104       | <i>KCNE1</i> | p.D85N         | Yes                                  | 0.011      |
| 170       | <i>KCNE1</i> | p.D85N         | Yes                                  | 0.011      |
| 51        | <i>KCNH2</i> | p.P1018A       | Proximal                             | 0.000      |
| 105       | <i>KCNH2</i> | p.T983I        | Yes                                  | 0.000      |
| 144       | <i>KCNH2</i> | p.A108T        | Yes                                  | 0.000      |
| 174       | <i>KCNH2</i> | p.R176W        | Yes                                  | 0.000      |
| 13        | <i>KCNJ2</i> | p.C43Y         | Proximal                             | 0.000      |
| 64        | <i>KCNJ2</i> | p.C43Y         | Proximal                             | 0.000      |
| 73        | <i>KCNJ2</i> | p.L408V        | Proximal                             | 0.000      |
| 39        | <i>KCNQ1</i> | p.G629fs       | Yes                                  | 0.000      |
| 54        | <i>KCNQ1</i> | p.G649S        | No                                   | 0.000      |
| 111       | <i>KCNQ1</i> | p.P197L        | Yes                                  | 0.000      |
| 12        | <i>MEF2A</i> | p.P277L        | Yes                                  | 0.001      |
| 85        | <i>MEF2A</i> | p.R17X         | Yes                                  | 0.000      |
| 80        | <i>SCN5A</i> | p.R526H        | Yes                                  | 0.000      |
| 167       | <i>SCN5A</i> | p.P1988A       | Yes                                  | 0.002      |
| 187       | <i>SCN5A</i> | p.P1988A       | Yes                                  | 0.002      |
| 187       | <i>SCN5A</i> | p.L1792F       | Proximal                             | 0.000      |
| 47        | <i>SCN5A</i> | p.P1988A       | Yes                                  | 0.002      |
| 55        | <i>SCN5A</i> | p.P1988A       | Yes                                  | 0.002      |
| 124       | <i>SCN5A</i> | p.P1988A       | Yes                                  | 0.002      |
| 144       | <i>SCN5A</i> | p.G615E        | Yes                                  | 0.000      |
| 154       | <i>SCN5A</i> | p.P1988A       | Yes                                  | 0.002      |
| 155       | <i>SCN5A</i> | p.P1988A       | Yes                                  | 0.002      |

MAF denotes minor allele frequency.





Table S6. Truncating mutations in TTN, band-location and exon usage.

| <b>Variant</b>                                         | <b>Band</b> | <b>Constitutive<br/>in CCDS</b> |
|--------------------------------------------------------|-------------|---------------------------------|
| NM_001256850:exon308:c.98972_98975del;p.32991_32992del | M           | Yes                             |
| NM_001256850:c.70372+1delG                             | M           | Yes                             |
| NM_001256850:exon285:c.C86191T;p.Q28731X               | A           | Yes                             |
| NM_001256850:exon285:c.G85447T;p.E28483X               | A           | Yes                             |
| NM_001256850:exon276:c.81261delC;p.V27087fs            | A           | Yes                             |
| NM_001256850:exon276:c.C66679T;p.R22227X               | A           | Yes                             |
| NM_001256850:exon260:c.C59887T;p.R19963X               | A           | Yes                             |
| NM_001256850:exon254:c.C56953T;p.R18985X               | A           | Yes                             |
| NM_001256850:exon245:c.C52846T;p.R17616X               | A           | Yes                             |
| NM_001256850:exon222:c.46521delT;p.P15507fs            | A           | Yes                             |
| NM_001256850:exon180:c.37448_37467del;p.12483_12489del | I           | Yes                             |
| NM_001256850:c.34930+2A>G                              | I           | No                              |
| NM_001256850:exon133:c.C32113T;p.R10705X               | I           | No                              |
| NM_001256850:exon71:c.G20279A;p.W6760X                 | I           | No                              |

CCDS denotes conserved coding DNA sequence.

## References

1. Cerqueira MD, Weissman NJ, Dilsizian V, et al. Standardized myocardial segmentation and nomenclature for tomographic imaging of the heart: a statement for healthcare professionals from the Cardiac Imaging Committee of the Council on Clinical Cardiology of the American Heart Association. *Circulation* 2002;105:539-42.
2. Petersen SE, Selvanayagam JB, Wiesmann F, et al. Left ventricular non-compaction: insights from cardiovascular magnetic resonance imaging. *J Am Coll Cardiol* 2005;46:101-5.
3. Axel L. Papillary muscles do not attach directly to the solid heart wall. *Circulation* 2004;109:3145-8.
4. Kawel N, Nacif M, Arai AE, et al. Trabeculated (noncompacted) and compact myocardium in adults: the multi-ethnic study of atherosclerosis. *Circ Cardiovasc Imaging* 2012;5:357-66.
5. Bainbridge MN, Wang M, Wu Y, et al. Targeted enrichment beyond the consensus coding DNA sequence exome reveals exons with higher variant densities. *Genome Biol* 2011;12:R68.
6. Reid JG, Carroll A, Veeraraghavan N, et al. Launching genomics into the cloud: deployment of Mercury, a next generation sequence analysis pipeline. *BMC Bioinformatics* 2014;15:30.
7. Arbustini, E, et al. Left Ventricular Noncompaction A Distinct Vardiomyopathy?. *Journal of the American College of Cardiology* 2016;68:549-966.
