# Supplementary material
Source: PubMed Central journal article supplement (PMC5665372)
Supplement: NIHMS889824-supplement-Removal_Consent__Miszalski-Jamka_.pdf [file NIHMS889824-supplement-Removal_Consent__Miszalski-Jamka_.pdf]

Tomasz Miszalski-Jamka MD, PhD, Assoc Prof

Kraków, 29th March 2017

Medical and Research Director

JCI Clinical Trials Center

Jagiellonian Center of Innovation LLC

ul. Bobrzyńskiego 14

30-348 Kraków

Poland

Martin Banigan

Editorial Assistant

Circulation: Cardiovascular Genetics

200 5th Avenue, Suite 1020

Waltham, MA 02451

I agree to be removed from the author list of manuscript entitled "*Novel Multi-Genetic Triggers and Genotype-Phenotype Correlations in Patients with Left Ventricular Non-Compaction*".



Tomasz Miszalski-Jamka MD, PhD, Assoc Prof
